# Supplementary material for: Plasticity first: molecular signatures of a complex morphological trait in filamentous cyanobacteria
Source: PubMed Central journal article supplement (PMC5580265; doi:10.1186/s12862-017-1053-5), 2017-08-31
Supplement: 12862_2017_1053_MOESM2_ESM.pdf [file 12862_2017_1053_MOESM2_ESM.pdf]

**Table S1: TSS statistics.**

**A) Number of detected TSSs.** TSSs are condition specific if they are found as enriched in only one condition by TSSPredator and the step height in the other condition is 0.

|                     | Both conditions | Treatment only | Control only | Total  |
|---------------------|-----------------|----------------|--------------|--------|
| <i>F. muscicola</i> | 13,710 (91%)    | 971 (6%)       | 456 (3%)     | 15,137 |
| <i>F. thermalis</i> | 11,442 (96%)    | 339 (3%)       | 187 (2%)     | 11,968 |
| <i>C. fritschii</i> | 16,931 (87%)    | 1,217 (6%)     | 1,272 (7%)   | 19,420 |

**B) Frequency of TSS per ORF**

***F. muscicola* PCC 7414**

| Class | TSSs  | ORFs  | Min TSS/ORF | Max TSS/ORF | Median TSS/ORF | Mean TSS/ORF | r2*   | p*        |
|-------|-------|-------|-------------|-------------|----------------|--------------|-------|-----------|
| gTSS  | 7,427 | 4,377 | 1           | 8           | 1              | 1.70         | 0.002 | 0.010     |
| aTSS  | 5,690 | 3,297 | 1           | 8           | 1              | 1.73         | 0.229 | 1.88E-182 |
| iTSS  | 4,554 | 2,989 | 1           | 8           | 1              | 1.52         | 0.134 | 2.93E-95  |
| nTSS  | 1,420 | -     | -           | -           | -              | -            | -     | -         |

***F. thermalis* PCC 7521**

| Class | TSSs  | ORFs  | Min TSS/ORF | Max TSS/ORF | Median TSS/ORF | Mean TSS/ORF | r2*       | p*        |
|-------|-------|-------|-------------|-------------|----------------|--------------|-----------|-----------|
| gTSS  | 5,767 | 3,392 | 1           | 7           | 1              | 1.70         | 4.928E-04 | 0.195     |
| aTSS  | 4,406 | 2,579 | 1           | 9           | 1              | 1.71         | 0.228     | 5.81E-147 |
| iTSS  | 3,566 | 2,299 | 1           | 10          | 1              | 1.55         | 0.108     | 6.00E-59  |
| nTSS  | 1,203 | -     | -           | -           | -              | -            | -         | -         |

***C. fritschii* PCC 6912**

| Class | # TSS | # ORF | Min TSS/ORF | Max TSS/ORF | Median TSS/ORF | Mean TSS/ORF | r2*  | p*        |
|-------|-------|-------|-------------|-------------|----------------|--------------|------|-----------|
| gTSS  | 9,242 | 5,068 | 1           | 7           | 2              | 1.82         | 0.00 | 0.0229    |
| aTSS  | 7,264 | 3,841 | 1           | 18          | 1              | 1.89         | 0.27 | 5.92E-260 |
| iTSS  | 6,595 | 3,773 | 1           | 10          | 1              | 1.75         | 0.17 | 1.35E-158 |
| nTSS  | 1,516 | -     | -           | -           | -              | -            | -    | -         |

\* Spearman correlation test between ORF length and frequency of TSSs
