# Supplementary material for: Plasticity first: molecular signatures of a complex morphological trait in filamentous cyanobacteria
Source: PubMed Central journal article supplement (PMC5580265; doi:10.1186/s12862-017-1053-5), 2017-08-31
Supplement: 12862_2017_1053_MOESM3_ESM.pdf [file 12862_2017_1053_MOESM3_ESM.pdf]

**Table S2. Orthologous TSS conservation.** For each pair of TSS-classes we compare the ratio of orthologous TSSs to the total frequency of TSSs (using Fisher exact test). The class with a larger ratio includes more positional orthologs and is therefore more conserved. TSSs that fit into more than one class (i.e., gaTSS, giTSS, aiTSS and gaiTSS) were excluded from the analysis.

**A) Comparison of *F. muscicola* and *F. thermalis***

| TSS-Type  | # gTSS | # aTSS | # iTSS |                | H1: gTSS > aTSS | H1: gTSS < aTSS | H1: gTSS > iTSS | H1: gTSS < iTSS | H1: aTSS > iTSS | H1: aTSS < iTSS |
|-----------|--------|--------|--------|----------------|-----------------|-----------------|-----------------|-----------------|-----------------|-----------------|
| Ortholog  | 796    | 994    | 513    | p-value:       | 0.991           | 0.011           | 0.332           | 0.693           | 0.006           | 0.995           |
| Singleton | 1,639  | 1,786  | 1,091  | FDR corrected: | 0.991           | <b>0.032</b>    | 0.498           | 0.995           | <b>0.018</b>    | 0.995           |
| Total     | 2,435  | 2,780  | 1,604  |                |                 |                 |                 |                 |                 |                 |

**Conclusion:** aTSS positional orthologs are enriched (i.e., more conserved) in comparison to gTSS and iTSS. No difference between gTSS and iTSS

**B) Comparison of *F. muscicola* and *C. fritschii***

| TSS-Type  | # gTSS | # aTSS | # iTSS |                | H1: gTSS > aTSS  | H1: gTSS < aTSS | H1: gTSS > iTSS  | H1: gTSS < iTSS | H1: aTSS > iTSS | H1: aTSS < iTSS |
|-----------|--------|--------|--------|----------------|------------------|-----------------|------------------|-----------------|-----------------|-----------------|
| Ortholog  | 449    | 314    | 147    | p-value:       | 2.200E-16        | 1.000           | 2.200E-16        | 1.000           | 0.001           | 0.999           |
| Singleton | 2,397  | 3,422  | 2,195  | FDR corrected: | <b>3.300E-16</b> | 1.000           | <b>3.300E-16</b> | 1.000           | <b>0.001</b>    | 1.000           |
| Total     | 2,846  | 3,736  | 2,342  |                |                  |                 |                  |                 |                 |                 |

**Conclusion:** gTSS positional orthologs are enriched (i.e., more conserved) in comparison to aTSS and iTSS. aTSS positional orthologs are enriched in comparison to iTSS.
