# Supplementary material for: Plasticity first: molecular signatures of a complex morphological trait in filamentous cyanobacteria
Source: PubMed Central journal article supplement (PMC5580265; doi:10.1186/s12862-017-1053-5), 2017-08-31
Supplement: 12862_2017_1053_MOESM4_ESM.pdf [file 12862_2017_1053_MOESM4_ESM.pdf]

**Table S3. TSS-locus sequence similarity in comparison to ORF sequence similarity**

**A) TSS locus vs. protein sequence similarity, *F. muscicola* / *F. thermalis***

| Class | Analysis             | TSS-type            | Median TSS-locus similarity (%) | Median Protein similarity (%) | Median* | p*                | Conclusion*                                  |
|-------|----------------------|---------------------|---------------------------------|-------------------------------|---------|-------------------|----------------------------------------------|
| gTSS  | per TSS              | Positional Ortholog | 96                              | 96                            | 0.46    | <b>1.332E-17</b>  | Protein sequences more similar than TSS-loci |
|       |                      | Singleton           | 86                              | 95                            | 6.97    | <b>5.914E-278</b> | Protein sequences more similar than TSS-loci |
|       | per orthologous gene | Positional Ortholog | 95                              | 96                            | 0.71    | <b>3.841E-10</b>  | Protein sequences more similar than TSS-loci |
|       |                      | Singleton           | 86                              | 95                            | 7.67    | <b>1.186E-153</b> | Protein sequences more similar than TSS-loci |
| aTSS  | per TSS              | Positional Ortholog | 96                              | 96                            | -0.59   | <b>5.126E-19</b>  | TSS-loci more similar than protein sequences |
|       |                      | Singleton           | 94                              | 95                            | 0.49    | <b>3.658E-07</b>  | Protein sequences more similar than TSS-loci |
|       | per orthologous gene | Positional Ortholog | 96                              | 96                            | -0.46   | <b>1.148E-06</b>  | TSS-loci more similar than protein sequences |
|       |                      | Singleton           | 94                              | 95                            | 0.86    | <b>5.797E-14</b>  | Protein sequences more similar than TSS-loci |
| iTSS  | per TSS              | Positional Ortholog | 96                              | 96                            | -0.67   | <b>6.917E-18</b>  | TSS-loci more similar than protein sequences |
|       |                      | Singleton           | 94                              | 95                            | 0.26    | <b>3.955E-03</b>  | Protein sequences more similar than TSS-loci |
|       | per orthologous gene | Positional Ortholog | 96                              | 96                            | -0.67   | <b>2.393E-08</b>  | TSS-loci more similar than protein sequences |
|       |                      | Singleton           | 94                              | 95                            | 0.63    | <b>1.274E-07</b>  | Protein sequences more similar than TSS-loci |

**B) TSS locus vs. protein sequence similarity, *F. muscicola* / *C. fritschii***

| Class | Analysis             | TSS-type            | Median TSS-locus similarity (%) | Median Protein similarity (%) | Median* | p*                | Conclusion*                                  |
|-------|----------------------|---------------------|---------------------------------|-------------------------------|---------|-------------------|----------------------------------------------|
| gTSS  | per TSS              | Positional Ortholog | 73                              | 82                            | 8.34    | <b>7.394E-93</b>  | Protein sequences more similar than TSS-loci |
|       |                      | Singleton           | 51                              | 80                            | 21.80   | <b>0.000E+00</b>  | Protein sequences more similar than TSS-loci |
|       | per orthologous gene | Positional Ortholog | 73                              | 82                            | 8.49    | <b>7.621E-41</b>  | Protein sequences more similar than TSS-loci |
|       |                      | Singleton           | 52                              | 80                            | 21.10   | <b>2.075E-272</b> | Protein sequences more similar than TSS-loci |
| aTSS  | per TSS              | Positional Ortholog | 81                              | 81                            | 0.11    | 6.345E-02         | No differences between similarites           |
|       |                      | Singleton           | 79                              | 79                            | 1.43    | <b>2.473E-13</b>  | Protein sequences more similar than TSS-loci |
|       | per orthologous gene | Positional Ortholog | 81                              | 81                            | -0.29   | 1.425E-01         | No differences between similarites           |
|       |                      | Singleton           | 78                              | 79                            | 2.03    | <b>1.428E-14</b>  | Protein sequences more similar than TSS-loci |
| iTSS  | per TSS              | Positional Ortholog | 81                              | 82                            | 0.24    | 8.828E-01         | No differences between similarites           |
|       |                      | Singleton           | 79                              | 79                            | 0.83    | <b>7.625E-04</b>  | Protein sequences more similar than TSS-loci |
|       | per orthologous gene | Positional Ortholog | 81                              | 82                            | 0.46    | 9.225E-01         | No differences between similarites           |
|       |                      | Singleton           | 79                              | 79                            | 1.28    | <b>1.661E-06</b>  | Protein sequences more similar than TSS-loci |

(\*) Using Wilcoxon ranksum test
